1 **An Approach to Measuring Protein Turnover in Human Induced Pluripotent Stem**  
2 **Cell Organoids by Mass Spectrometry**

3

4 Anthony Duchesne<sup>1,4</sup>, Jing Dong<sup>1,4</sup>, Andrew N. Bayne<sup>1</sup>, Nguyen-Vi Mohamed<sup>2</sup>, Wei Yi<sup>2</sup>,  
5 Meghna Mathur<sup>2</sup>, Edward A. Fon<sup>2</sup>, Thomas M. Durcan<sup>2</sup>, Jean-François Trempe<sup>1,3,5,\*</sup>

6

7

8 <sup>1</sup> Department of Pharmacology & Therapeutics and Centre de Recherche en Biologie  
9 Structurale, McGill University, 3655 Promenade Sir William Osler, Montreal, Quebec,  
10 H3G 1Y6, Canada.

11 <sup>2</sup> Early Drug Discovery Unit (EDDU), Montreal Neurological Institute-Hospital, Department  
12 of Neurology and Neurosurgery, McGill University, 3801 University Street, Montreal,  
13 Quebec, H3A 2B4, Canada

14 <sup>3</sup> Brain Repair and Integrative Neuroscience (BRaIN) Program, Centre for Translational  
15 Biology, Research Institute of the McGill University Health Centre, 1001 Bd Décarie,  
16 Montréal, Quebec, H4A 3J1, Canada

17 <sup>4</sup> Both authors contributed equally to this work

18 <sup>5</sup> Lead contact

19 \* Correspondence: [jeanfrancois.trempe@mcgill.ca](mailto:jeanfrancois.trempe@mcgill.ca)

20

21 **Declaration of interests**

22 J.-F.T. is a member of the scientific advisory board of Mitokinin Inc.

23

24 **Abstract**

25 Patient-derived organoids from induced pluripotent stem cells have emerged as a model  
26 for studying human diseases beyond conventional two-dimensional (2D) cell culture.  
27 Briefly, these three-dimensional organoids are highly complex, capable of self-organizing,  
28 recapitulate cellular architecture, and have the potential to model diseases in complex  
29 organs, such as the brain. For example, the hallmark of Parkinson's disease - proteostatic  
30 dysfunction leading to the selective death of neurons in the substantia nigra - present a  
31 subtle distinction in cell type specificity that is simply lost in 2D cell culture models. As  
32 such, the development of robust methods to study global proteostasis and protein  
33 turnover in organoids will remain a critical need as organoid models evolve. To solve this  
34 problem, we have designed a workflow to extract proteins from organoids and measure  
35 global protein turnover using mass spectrometry and stable isotope labeling using amino  
36 acids in cell culture (SILAC). This allowed us to measure the turnover rates of 844 proteins  
37 and compare protein turnover to previously reported data in primary cell cultures and *in*  
38 *vivo* models. Taken together, this method will facilitate the study of proteostasis in  
39 organoid models of human disease and will provide an analytical and statistical  
40 framework to measure protein turnover in organoids of all cell types.

41

42

## 43 **1.1 Organoids as a novel model to recapitulate neurodegenerative disease**

44 Three dimensional (3D) human brain organoids derived from induced pluripotent stem  
45 cells (iPSCs) have emerged as a novel tool in modelling distinct regions of the brain and  
46 can even reconstitute neuronal crosstalk via organoid fusions [1-4]. This technology  
47 serves as a critical bridge between 2D cultures and *in vivo* models in examining complex  
48 neural mechanisms and their dysregulation in disease. Unlike traditional *in vitro* cultures,  
49 the architecture of organoids consists of multiple region-specific cell types conferring  
50 more physiologically relevant characteristics [5,6]. Two examples of disease-relevant  
51 hallmarks in organoids that remain poorly captured in 2D culture models are as follows:  
52 (1) midbrain organoids are capable of producing neuromelanin-like granules, a distinct  
53 structure resulting from dopamine synthesis that are highly enriched in the neurons lost  
54 in Parkinson's disease (PD) [1,5,7], and (2)  $\beta$ -amyloid plaques and neurofibrillary tangles  
55 are found in cerebral organoids, a pathological marker of Alzheimer's disease (AD)  
56 pathology [8].

57 These findings demonstrate that brain organoids complement existing model systems as  
58 a tool to study the mechanisms underlying neurodegenerative diseases. However,  
59 despite their promise as a driver for scientific discovery, the technology is still in its infancy  
60 as validated approaches focusing on experimental methods to study these models are  
61 lacking.

62

## 63 **1.2 Protein Dynamics in Neurodegeneration**

64 Turnover, the dynamic process of the removal and replacement of proteins, is essential  
65 to maintaining the homeostasis of all cells including neurons [9]. Studies have shown that

66 dysfunctional mitochondria and their impaired turnover is a fundamental problem  
67 associated with specific neurodegenerative disorders such as PD, AD and Amyotrophic  
68 Lateral Sclerosis [10]. In fact, mutations in PINK1 and Parkin, two proteins implicated in  
69 the selective turnover of mitochondria, cause autosomal recessive juvenile PD [11].  
70 Furthermore, defects in both the ubiquitin proteasome system and autophagy lead to  
71 protein misfolding and aggregation, a common mechanism of pathogenesis in  
72 neurodegenerative diseases, such as PD, AD and Huntington's Disease [12,13]. As such,  
73 the proteome-wide study of protein dynamics in organoids presents a unique opportunity  
74 to uncovering novel mechanisms of neurodegeneration. Other studies have used  
75 quantitative mass spectrometry to profile differential protein expression in brain organoids  
76 following drug treatment [14,15]. However, there are currently no established methods to  
77 measure protein turnover in these systems. Our study aims to address that gap and  
78 provides a robust methodology for protein turnover measurement in organoids.

79

### 80 **1.3 Measuring protein turnover in organoids using SILAC**

81 Protein turnover can be measured using stable isotope labelled amino acids (SILAC)  
82 coupled with quantitative proteomics by mass spectrometry (MS). While stable isotope  
83 labels can be introduced into proteins either metabolically, chemically, or enzymatically,  
84 this study will focus on metabolic labelling, as it is the most effective implementation for  
85 *in-* and *ex- vivo* systems [16]. Briefly, the metabolic labelling approach of SILAC involves  
86 growing cells in two separate media: (1) the "light" medium, which contains an amino acid  
87 with all atoms at their natural isotope abundance and (2) a "heavy" medium, which  
88 contains heavy isotope labels incorporated into the same amino acid. The "heavy" labeled

89 amino acid is subsequently incorporated into newly synthesized proteins, which induces  
90 a small mass shift in the digested peptides that is distinguishable by MS. The ratio of  
91 heavy to light (H:L) abundance of each peptide can be measured at different time-points  
92 in a pulse-chase-like time course experiment. The H:L ratios for all peptides of a given  
93 protein can then be averaged to compute a half-life for that particular protein. One critical  
94 requirement for the measurement of turnover in this manner is that the protein levels must  
95 remain constant throughout the time course (steady state); in this case, the rate of  
96 synthesis must equal the rate of degradation, allowing the turnover rate to be calculated.  
97 Common SILAC labels apply  $^{13}\text{C}$  or  $^{15}\text{N}$  isotopes within Arg or Lys in media to 2D cell  
98 culture systems, or in heavy labelled food of animals such as zebrafish, newts and mouse.  
99 [17-21].  $^{13}\text{C}_6$ -labeled Lys, an essential amino acid, has been used to measure the  
100 turnover of proteins in mice [22]. Alternatively, leucine is also an essential amino acid that  
101 is highly abundant, and less costly than its Lys/Arg label counterparts. Furthermore,  
102 leucine does not undergo metabolic scrambling, the process in which the heavy label is  
103 metabolized and incorporated into other amino acids potentially confounding analysis  
104 [23]. Leucine is indeed catabolized to  $\alpha$ -ketoisocaproic acid and  $\beta$ -hydroxy- $\beta$ -  
105 methylbutyric acid, two metabolites that enter cholesterol biosynthesis or the citric acid  
106 cycle via acetyl-CoA, where the branched aliphatic  $\delta$  carbons are excreted through carbon  
107 dioxide.

108 Other studies have validated the use of heavy leucine in turnover measurements by  
109 feeding *Drosophila melanogaster* [5,5,5]-deuterium-3-leucine (D3-Leu) food that was  
110 incorporated into the flies over time [24]. Likewise, organoid models can be cultured with  
111  $^{13}\text{C}$ ,  $^{15}\text{N}$ -labeled lysine and arginine to characterize growth and protein abundance under

112 different conditions [25]. Here, we report a robust proteomic method that measures the  
113 half-life of proteins in iPSC-derived organoid tissue using D3-Leu as a tracer. Our  
114 approach has been optimized to produce robust and consistent data from a variety of  
115 protein processing and mass spectrometry methods.

## 116 **2. Methods**

### 117 **Cell-line information and ethical approvals**

118 The use of iPSCs in this research is approved by the McGill University Health Centre  
119 Research Ethics Board (DURCAN\_IPSC / 2019-5374). AIW002 lines come from C-BIG  
120 repository, The Neuro.

121

### 122 **2.1 Organoid Generation**

123 Human midbrain organoids (hMOs) derived from healthy individuals were provided by the  
124 Neuro's Early Drug Discovery Unit (<https://www.mcgill.ca/neuro/open-science/eddu>). The  
125 complete procedure regarding generation is described in the standardized protocol ref:  
126 <https://doi.org/10.12688/mniopenres.12816.2> [26].

127

### 128 **2.2 In Vivo Stable Isotope Labeling of hMOs**

129 The SILAC time course experiment consisted of triplicate hMOs (n = 3) at five different  
130 time points: Day 0, 3, 7, 14 and 28. Sixty-day old hMOs were incubated in light SILAC  
131 media (Tables 1 and 2). After 7 days of incubation, 3 hMOs were extracted as day 0  
132 (baseline), flash frozen and stored at -80°C until needed. The remaining hMOs were  
133 transferred to heavy SILAC media and left to incubate for the corresponding number of  
134 days. Both heavy and light media were changed every 2-3 days. All other hMOs were  
135 then extracted, frozen, and stored at each designated timepoint following the time course  
136 schedule. As a negative control for heavy isotope incorporation, 3 hMOs were also grown  
137 in light media and were harvested on Day 28. These hMOs were not included in any  
138 turnover calculations.

139

### 140 **2.3 hMOs Sample Preparation**

141 hMOs were removed from -80°C storage and rinsed in buffer (50 mM Tris • HCl, pH 7.5).  
142 They were then placed in a Potter-Elvehjem PTFE glass tube Dounce homogenizer with  
143 200 µL of lysis buffer (50 mM Tris • HCl, pH 7.5, 8 M urea, 1 mM EDTA, 1X Halt™  
144 Protease Inhibitor Cocktail, 1X PhosStop™ Phosphatase Inhibitor Cocktail). Each hMO  
145 was homogenized in the lysis buffer with 30-35 pestle strokes and transferred to a 1.5 mL  
146 Eppendorf. The tubes were sonicated in a bath sonicator for 10 minutes and spun at  
147 16,000 g for 10 minutes at 4°C. The supernatants were collected and placed into new  
148 low-bind 1.5 mL tubes on ice. Protein concentrations of each supernatant were measured  
149 using Pierce BCA protein assay kit, according to manufacturer's instructions. All samples  
150 were normalized to 1 µg /µL in 1X Laemmli buffer and were boiled at 80°C for 5 minutes  
151 for subsequent SDS-PAGE in-gel digestion.

152

### 153 **2.4 In-Gel Digestion**

154 For each sample, 20 µg of organoid lysates were loaded onto a 10% Mini-PROTEAN®  
155 TGX™ Precast Protein Gels (50 µl wells). Samples were run at 100 V until the samples  
156 migrated fully into the stacking region of the gel. Protein bands were visualized using  
157 SimplyBlue™ SafeStain (ThermoFisher), according to manufacturer instructions. Each  
158 sample was excised in a single band using a clean razor blade, and in-gel digestion was  
159 performed as previously described [27]. Briefly, each band was destained, reduced with  
160 10 mM DTT, alkylated with 55 mM iodoacetic acid, and digested with trypsin overnight at  
161 37 °C. Digested peptides were extracted with 1:2 (vol/vol) 5% formic acid / acetonitrile,  
162 transferred to a clean 1.5 mL Eppendorf tube, and dried in a Savant SPD2010 SpeedVac



163 (ThermoFisher). Peptides were re-suspended in 0.1 % formic acid, and their  
164 concentrations were measured using the Pierce Quantitative Colorimetric Peptide assay.

165

## 166 **2.5 LC-MS/MS**

167 2 ug of extracted peptides were re-solubilized in 0.1% aqueous formic acid / 2%  
168 acetonitrile and loaded onto a Thermo Acclaim Pepmap (Thermo, 75 µm ID X 2 cm C18  
169 3 µm beads) pre-column and then onto an Acclaim Pepmap EASY-Spray (Thermo, 75  
170 µm X 15 cm with 2 µm C18 beads) analytical column separation using a Dionex Ultimate  
171 3000 uHPLC at 250 nl/min with a gradient of 2-35% organic (0.1% formic acid in  
172 acetonitrile) over 3 hours. Peptides were analyzed using a Thermo Orbitrap Fusion mass  
173 spectrometer operating at 120,000 resolution (FWHM in MS1) with HCD sequencing  
174 (15,000 resolution) at top speed for all peptides with a charge of 2+ or greater.

175

## 176 **2.6 Data Processing**

177 Our data processing protocol is easily portable to data generated from different mass  
178 spectrometer vendors and/or digestion methods, as it utilizes freely available, open-  
179 source software. The basic workflow consists of: (1) peptide identification from raw data  
180 files in MaxQuant; (2) spectral library building in Skyline; (3) protein half-life determination  
181 in Topograph; (4) data parsing, filtering, and analysis.

182

### 183 **2.6.1 Peptide identification and database search with MaxQuant**

184 RAW mass spectra data was processed using Andromeda, integrated into MaxQuant  
185 (version 1.6.5) [28]. While MaxQuant has the ability to specify heavy labels and calculate

186 H:L peptide ratios directly, our workflow uses MaxQuant solely as a means for protein  
187 identification for spectral library building in Skyline.

188 1. Load all RAW data into MaxQuant using “Load folder” with “Recursive” selected,  
189 and give each file a name with “Set experiment”. Biological replicates must have  
190 unique experiment names (eg. run\_1, run\_2, run\_3), as they will be combined later  
191 in Topograph.

192 2. In “Group-specific parameters”, select carbamidomethylation (C) as a fixed modification.  
193 Select oxidation (M) and protein acetylation (N-term) as variable modifications. For  
194 instrument parameters, select default MaxQuant parameters for an Orbitrap, including a  
195 first search peptide tolerance of 20 ppm and a main search peptide tolerance of 4.5 ppm.

196 3. Select Trypsin/P as an enzyme for cleavage, and permit a maximum of two missed  
197 cleavages.

198 4. In “Global parameters”, add your FASTA file of interest (ie. reviewed human proteome  
199 from UniProt; UP000005640). Select the row and set the identifier rule to “Uniprot  
200 identifier”. The minimum peptide length can be left at 7 a.a.

201 5. In “Identification”, ensure that you select “Match between runs” to enable  
202 transferring of protein identifications across runs. All other settings can be left  
203 default.

204 6. Set the number of dedicated processors in the bottom left and start the run.  
205

## 206 **2.6.2 Building Spectral Library through Skyline**

207 Skyline (version 21.1) is an open-source application for targeted proteomics and  
208 quantitative data analysis [29]. Skyline can build spectral libraries, collections of known

209 peptide sequence spectra, which are then used to identify and compare unknown mass  
210 spectra. For additional details and tutorials, visit the Skyline website:

211 <https://skyline.ms/project/home/software/Skyline/begin.view>

- 212 1. Save RAW files and all MaxQuant output files in the same directory.
- 213 2. Create a blank Skyline document and save it the same folder with the RAW data and  
214 MaxQuant text file outputs
- 215 3. Select 'File' to import a 'Peptide Search'. Navigate to the msms.txt file and import with  
216 default settings.
- 217 4. Select the same FASTA file used for the MaxQuant search and import RAW files to create  
218 a BiblioSpec spectral library.

219

### 220 **2.6.3 Protein Half-Life Calculations with Topograph**

221 Topograph is able to process spectral libraries to calculate protein turnover rates through  
222 analyzing the fraction of heavy labels in newly synthesized proteins. The software is able  
223 integrate information from all biological replicates across all the timepoints to produce a  
224 half-life of a given protein. Furthermore, Topograph takes into account precursor pool  
225 enrichment levels, allowing for accurate calculations when the precursor pool is not fully  
226 labeled [30].

- 227 1. Create a new workspace in the same directory as the BiblioSpec library and RAW data  
228 files.
- 229 2. Navigate to 'Add Search Results' to select 'Import BiblioSpec library'
- 230 3. Keep the default static modification (C heavier by 57.021461 Da) and specify the heavy  
231 label by selecting the preset 'D3-Leu' option. Custom isotope labels can also be  
232 configured, if necessary.

- 233 4. Select and import RAW data files and begin analysis on peptides with default settings.  
234 This process can take several days depending on the complexity, quantity and size of the  
235 data.
- 236 5. After the peptide analysis is complete, select 'Set Cohort and Time points of Samples' and  
237 assign time points and the cohort of samples based on the experimental design. Specify  
238 the number of biological replicates and conditions associated with the experiment.
- 239 6. Prior to calculating half-lives, configure the following parameters under 'View half-lives':  
240 Select the option for 'Distribution of Unlabeled, Partially Labeled and Fully Labeled  
241 Peptides'. Set the percent of label at the start of the experiment to 0 and choose the  
242 median precursor pool. Set a minimum intensity of  $10^5$ , minimum deconvolution score of  
243 0.95, minimum turnover score of 0.98 and an outlier filter of TwoStdDev for the acceptance  
244 criteria. Choose 'Simple Linear Regression with 95% CI' for further statistical analysis. The  
245 curve should not be forced through the origin as there is a time delay from the introduction  
246 of the label to the appearance of the label in the peptide.
- 247 7. To calculate half-lives, select 'By Protein', then click 'Recalculate'
- 248 8. Select the view tab and navigate towards the options "Half Lives" and "Results By  
249 Replicate" to output "ResultRow" and "PerResultReplicate" as csv files. "ResultRow" is a  
250 table listing all the identified proteins and their corresponding half-lives and confidence  
251 intervals. "PerResultReplicate" is an overview of all the individual peptides found in each  
252 RAW file and displays the heavy label incorporation on a peptide level.

253

#### 254 **2.6.4 Data parsing, Filtering and Analysis**

255 Data cleansing is conducted through a combination of an in house-implementation of  
256 Excel VBA macros and manual validation.

- 257 1. Using the 'PerResultReplicate.csv' file, remove proteins with less than 2 peptides and less  
258 than 15 data points that contribute to the half-life calculation.
- 259 2. Using the 'ResultRow.csv' file, remove all proteins that have 'NA' values for their half-life  
260 or 95% confidence interval.
- 261 3. Divide the range of the 95% confidence interval with the half-life of each individual protein  
262 to yield a value analogous to the coefficient of variation. Exclude proteins with a  
263 "coefficient of variation" ratio of >0.3.

264

## 265 **2.7 Protein Abundance Calculations**

266 Topograph sums the peak areas of all forms of both the labelled (heavy) and unlabelled  
267 (light) peptide as a measure of total abundance. This abundance should be compared  
268 across time-points, either on a peptide or a protein level, to ensure that the steady state  
269 assumption remains valid.

- 270 1. Normalize the abundance values under the 'Area' column found in the  
271 'PerResultReplicate.csv' by dividing each individual value by the sum of all the values in  
272 that biological replicate.
- 273 2. Calculate the average abundance values for each peptide across all the biological  
274 replicates at day 0 and 28.
- 275 3. For each peptide, perform paired sample t-tests with a Benjamini Hochberg correction to  
276 compare the mean abundance values between day 0 and 28.
- 277 4. Exclude proteins associated with peptides that have significant differences in mean  
278 abundance from further turnover analysis.

279

## 280 **2.8 Statistical Analysis and Annotation**

281 All analyses and the generation of figures were performed through GraphPad Prism  
282 (GraphPad Software). Proteins were assigned a functional annotation using information  
283 from a variety of resources including gene and protein information databases (MitoCarta,  
284 COMPARTMENTS and KEGG) [31-33]. Functional enrichment analysis was performed  
285 with STRING (version 11.5), a database to predict and visualize protein interaction  
286 networks [34].

287

### 288 **3.1 Characterizing Protein Half- Lives**

289 D3-Leu was successfully incorporated into hMOs following incubation with D3-Leu media,  
290 which can be visualized in the MS1 mass spectrum by a corresponding 3 Da rightward  
291 shift for a given peptide (*ie.* 1.5 m/z shift for a peptide of 2+ charge) (Figure 2A). The  
292 absence of heavy label peaks in both D0 heavy and D28 light media only conditions  
293 confirm the selective incorporation of D3-Leu and highlight the robustness of D3-Leu  
294 based quantification. The hMOs also continued to incorporate heavy labels over time, as  
295 shown by increasing H:L ratios for peptides at later time points (Figure 2B). Specific  
296 protein turnover curves and half-life calculations were generated in Topograph. In the  
297 example provided, the electron transport chain protein ATP5A yielded a half-life of  $14 \pm$   
298 0.28 days (Figure 2C).

299 Overall, a total of 3280 proteins derived from 20842 peptides were identified from our MS  
300 data. After removing peptides that did not meet the acceptance criteria (2.6.4), 844  
301 proteins remained for analysis. All hMO protein half-lives were summarized and grouped  
302 according to KEGG annotation or cellular localization to investigate trends in  
303 compartment- or function-specific turnover rates (Figure 3). hMO half-lives ranged from 2

304 to 15 days, with an average half-life of 9.16 days. Most annotated protein groups did not  
305 deviate significantly from the population average, except for a few notable exceptions:  
306 first, mitochondrially localized proteins displayed significantly longer half-lives compared  
307 to all measured hMO proteins. Second, histones, proteasomal subunits, and ribosomes  
308 were also significantly longer lived. Long histone lifespans could be necessary for  
309 maintaining chromatin structure [35]. These findings also align with previous studies  
310 showing histones exceptional stability and persistence in mammalian models [22,35].  
311 Protein groups that demonstrated shorter lifetimes (compared to the rest of hMO proteins)  
312 consisted of those involved in endocytosis and RNA transport.

313

### 314 **3.2 Comparison of turnover rates with prior studies**

315 This is the first time that protein half-lives have been characterized in brain organoids. As  
316 such, we sought to compare our data with previously published turnover measurements  
317 in mice [22]. Overall, proteins were turned over faster in organoids than in mice  
318 (organoid<sub>t<sub>1/2</sub></sub> = 9.16 days vs. mouse<sub>t<sub>1/2</sub></sub> = 10.7 days,  $P < 0.0001$ ). When compared to  
319 different organs and brain regions in mice, hMOs were most similar to mouse hindbrains,  
320 albeit modestly (Figure 4A). To our knowledge, there are no datasets measuring protein  
321 turnover in mouse midbrains, so a direct comparison is not yet feasible. Still, the relative  
322 turnover of protein groups seemed to be conserved across organisms, as mitochondrial  
323 proteins were longer lived than all other proteins for both mouse and hMOs. Next, we  
324 compared our data to two separate studies measuring turnover in primary cultured  
325 neurons (Figure 4B) [36,37]. In both cases, the average lifetime of proteins in 2D-cultured  
326 neurons were faster than that of organoids. Taken together, our results position hMOs as

327 a model of mammalian proteostasis that lies between an *in vitro* 2D cell culture and an *in*  
328 *vivo* system. Future studies will be critical in profiling protein turnover within different  
329 organoid models to confirm these findings across tissues. Still, it will also be essential to  
330 clarify and resolve some inherent limitations in the current methodology for SILAC-based  
331 measurements in organoids.

332

### 333 **3.3 Limitations**

334 Organoids have immense potential for the modelling and understanding of various  
335 diseases, but still suffer from important limitations. Notably, organoids lack an efficient  
336 circulatory system leading to issues with oxygen and nutrient exchange [38]. Likewise,  
337 due to the inherent 3D organization of the tissue culture, cell necrosis has been observed  
338 at the core of many reported organoid models, which may contribute to a background  
339 pool of unlabeled proteins in our system [2]. Recent work has highlighted the utility of  
340 microfluidic devices in organoid systems to improve nutrient access and reproducibility in  
341 growth, which may also facilitate future studies in hMOs [39]. It is also important to note  
342 that turnover measurements in their current form necessitate a few key assumptions: (1)  
343 The biological system must be in a steady state; this can be verified by quantifying the  
344 total level of protein at the beginning and the end of the time course, as we did here (2)  
345 All fragments of a protein are turned over at the same rate (i.e. one turnover measurement  
346 is calculated for each protein, even if a proteolytic fragment or domain of a protein may  
347 be turned over more rapidly). Finally, it is also important to note that brain organoids are  
348 small and thus axons do not grow more than a few millimeters, whereas axons in  
349 mammals can be several centimeters, and even meters. This could create significant



350 differences in the turnover rate of proteins located in the soma compared to the synaptic  
351 terminals. Thus, the apparent differences between our lifetime calculations and previous  
352 studies could also reflect limitations with hMOs and our current experimental set-up.

353

#### 354 **4. Conclusion**

355 We have provided a robust framework for extracting proteins and measuring global  
356 protein turnover in human midbrain organoids. We have also developed a simple  
357 analytical and statistical workflow that can be implemented by scientists of all skill levels  
358 using open-source, freely available software. Using this methodology, we have shown  
359 that human midbrain organoids have a global protein turnover that is faster than mice, but  
360 slower than 2D neuronal cultures. Future work using our approach will be able to highlight  
361 crucial differences in protein turnover between control and disease models of brain  
362 organoids. Overall, our work facilitates the study of proteostasis in organoid models of  
363 human disease and will provide a framework to measure protein turnover in organoids of  
364 all cell types.

365

#### 366 **Acknowledgments**

367 We thank the McGill Pharmacology SPR/MS facility (M. Hancock) and the CFI for support,  
368 as well as the Proteomics platform at the Research Institute of the McGill University  
369 Health Centre (Lorne Taylor, Amy Wong, Jennifer Nedow). This work was supported by  
370 an *Innovation Ideas* grant from the *Healthy Brains, Healthy Lives* program at McGill. J.D  
371 and A.D were supported by a *Canada Graduate Scholarship* from the Canadian Institutes  
372 for Health Research (CIHR), and J.F.T. holds a Canada Research Chair (Tier 2) in

373 Structural Pharmacology (CIHR). E.A.F. is supported by a Foundation grant from the  
374 CIHR (FDN-154301) and a Canada Research Chair (Tier 1) in Parkinson's Disease.

375

376

377

378

379

380

381 **Table 1:** Manufacturer information regarding media and biochemical reagents used for  
382 organoid labeling  
383  
384

| <b>Reagents</b>                                                       | <b>Supplier / Manufacturer</b> | <b>Catalogue Number</b> |
|-----------------------------------------------------------------------|--------------------------------|-------------------------|
| Neurobasal (-L-Leu, -L-Lys, -L-Arg)                                   | Gibco                          | ME17677L1               |
| L-Leu (Unlabeled)                                                     | Cambridge Isotope              | ULM-8203-PK             |
| L-Leu (5,5,5-D3 Labeled)                                              | Cambridge Isotope              | DLM-1259-1              |
| L-Lys hydrochloride                                                   | Thermo Fisher                  | 88429                   |
| L-Arg hydrochloride                                                   | Thermo Fisher                  | 88427                   |
| N2                                                                    | Gibco                          | 17502048                |
| B27 without vitamin A                                                 | Gibco                          | 12587010                |
| GlutaMAX™-I                                                           | Gibco                          | 35050-061               |
| <b>Minimum Essential Medium- Non-Essential Amino Acids (MEM-NEAA)</b> | Gibco                          | 11140050                |
| 2-mercaptoethanol                                                     | Gibco                          | 21985023                |
| <b>Brain-derived Neurotrophic Factor (BDNF)</b>                       | PeprTech                       | 450-02                  |
| <b>Glial cell-derived Neurotrophic Factor (GDNF)</b>                  | PeprTech                       | 450-10                  |
| Ascorbic acid                                                         | Millipore Sigma                | A5960                   |
| <b>Dibutyl- cyclic AMP (db-cAMP)</b>                                  | Millipore Sigma                | D0627                   |
| <b>Penicillin-Streptomycin (Penni/Strep)</b>                          | Millipore Sigma                | P0781                   |

385  
386  
387  
388

389 **Table 2:** Recipe for preparation of labeling medium  
390

| Reagent and Final Concentration                        | Recipe for 50 mL |
|--------------------------------------------------------|------------------|
| Neurobasal (without L-Leu, L-Lys or L-Arg)             | 50 mL            |
| 1:100 N2                                               | 0.5 mL           |
| 1:50 B27 without vitamin A                             | 1 mL             |
| 1% GlutaMAX™-I                                         | 0.5 mL           |
| 1% MEM-NEAA                                            | 0.5 mL           |
| 2-mercaptoethanol                                      | 0.175 µL         |
| 10 ng/mL BDNF                                          | 25 µL            |
| 10 ng/mL GDNF                                          | 25 µL            |
| 100 µM ascorbic acid                                   | 25 µL            |
| 125 µM db-cAMP                                         | 12.5 µL          |
| Penni/Strep                                            | 0.05 mL          |
| 105 mg/L *L-Leu (Unlabeled) / L-Leu (5,5,5-D3 Labeled) | 0.5 mL           |
| 146 mg/L L-Lys                                         | 0.5 mL           |
| 84 mg/L L-Arg                                          | 0.5 mL           |

391  
392  
393

394 **Figures and Legends**

395

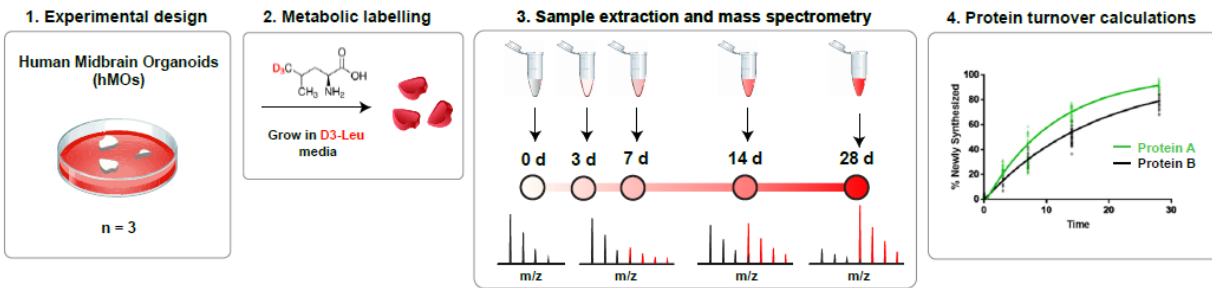

396

397 **Figure 1: Experimental overview.** Human midbrain organoids derived from healthy  
398 iPSC lines were metabolically labelled with D3-Leu SILAC media over a time course  
399 experiment. The organoids were processed at 5 different time points to extract proteins  
400 and digest into peptides for MS analysis at each time-point. Protein identifications and the  
401 rate of heavy isotope incorporation was determined through MS. Specific turnover rates  
402 on a protein level were calculated using MaxQuant, Skyline, and Topograph (all open-  
403 source software).

404

405

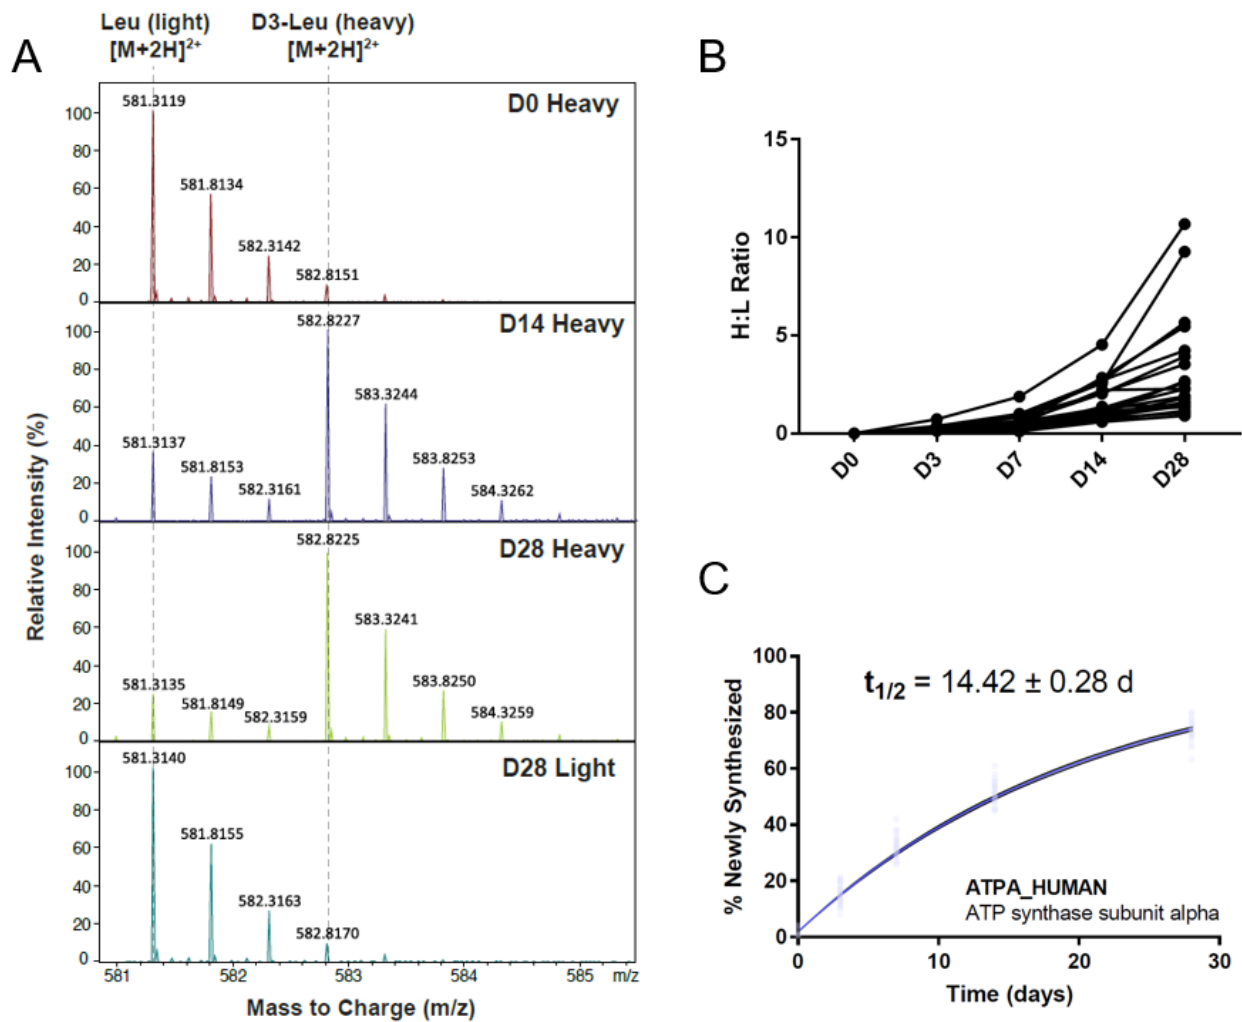

406

407 **Figure 2. D3-Leu incorporates into hMOs and produces robust protein half-life**  
408 **calculations.** A) A representative MS1 spectrum of a peptide at 3 different time points  
409 displaying successful incorporation of heavy D3-Leucine (H = heavy label peak, L = light  
410 label peak). B) Heavy to Light (H:L) ratios were calculated on all identified hMO proteins  
411 using MaxQuant. A progressive increase of H:L ratio can be observed over the time  
412 course. C) Example of Topograph half-life output for ATP synthase subunit alpha. Blue  
413 dots represent the 23 peptides across all the time points that contributed to the half-life  
414 calculation. Black lines indicate the 95% confidence interval.

415

416

417

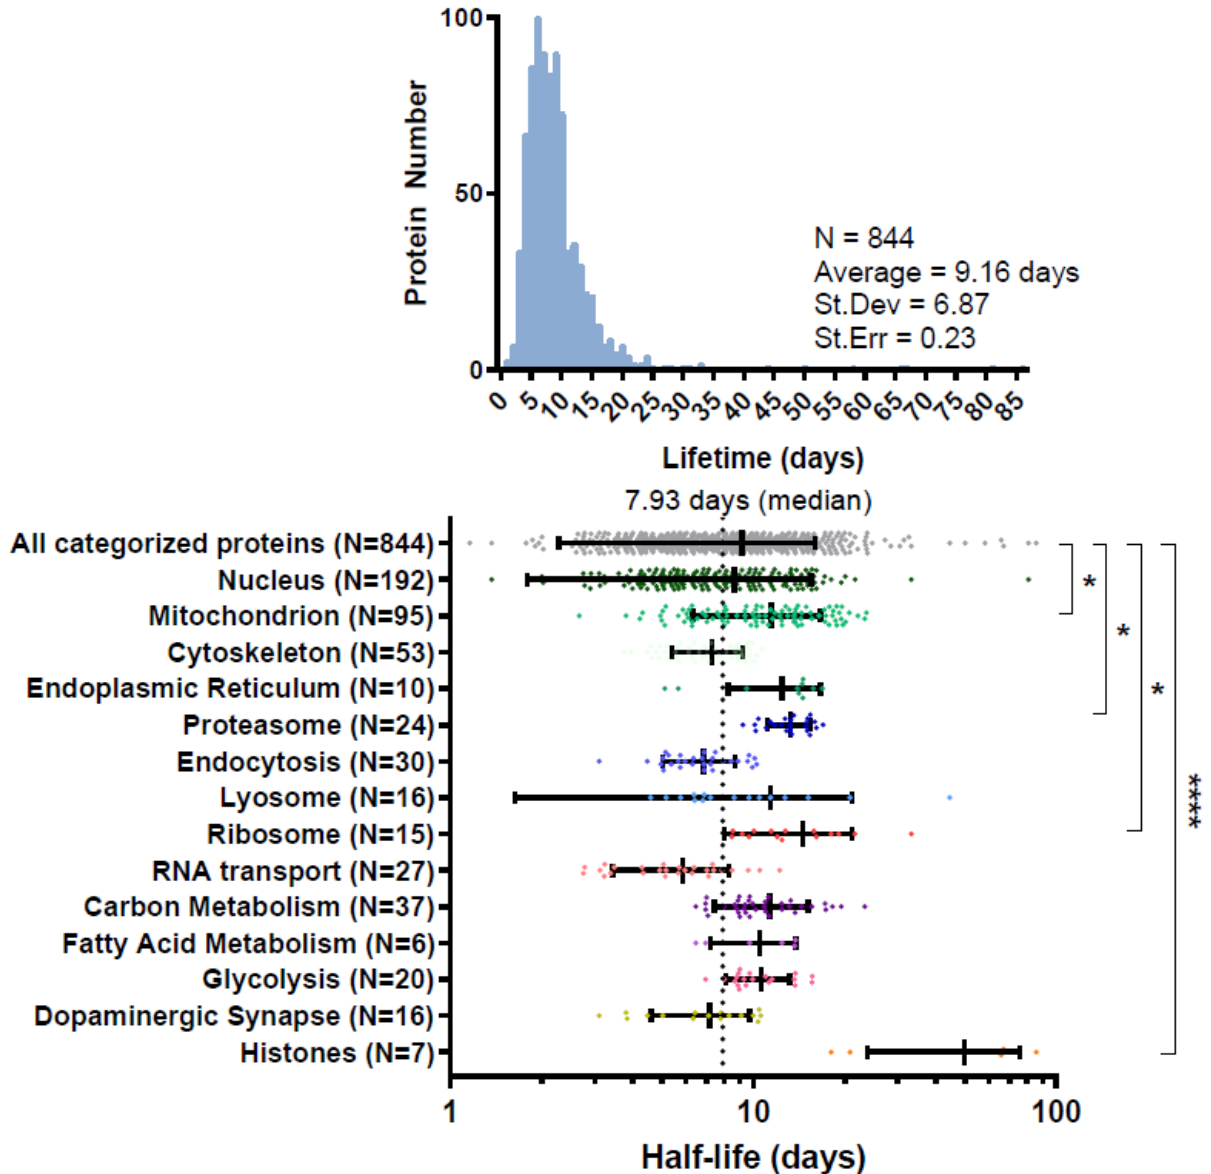

418

419 **Figure 3: Lifetime of organoid proteins.** Lifetimes of proteins organized into groups  
420 accordingly to their location and biological pathway. Each data point corresponds to a  
421 single protein lifetime, derived from 3 biological replicates and at least 2 distinct peptides.  
422 The black lines indicate the mean and the standard deviation (SD) for each group.  
423 Analysis of variance (ANOVA) followed by the Dunnett's test summarizes the significance  
424 of protein groups compared to the average half-life of all the proteins identified (\*  $\leq 0.05$ ,  
425 \*\*\*\*  $\leq 0.0001$ ).

426

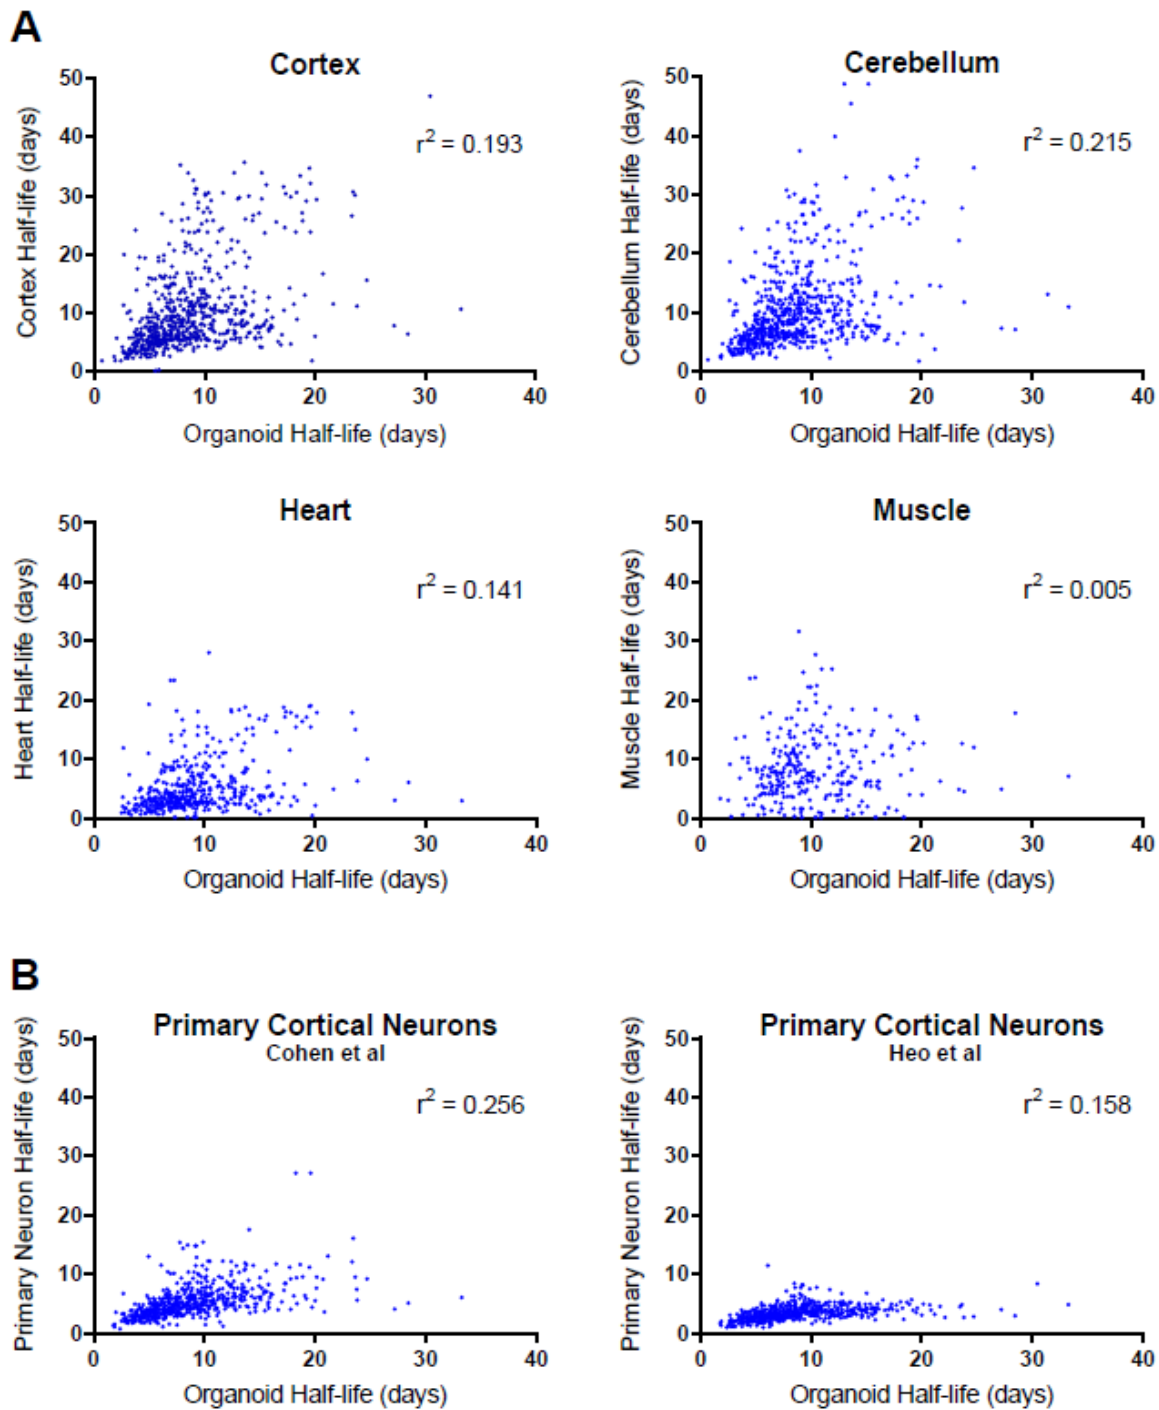

427

428 **Figure 4: Correlation between global hMO half-lives with mice and primary cultured**  
429 **neurons.** A) Scatterplot comparing lifetimes of proteins *in vivo* of four different organs  
430 with our organoid data, with Pearson's correlation coefficients denoted by  $r^2$ . B)  
431 Scatterplot comparing lifetimes of proteins with *in vitro* data from rat cortical neurons  
432 [36,37]. Correlation was determined through matching the corresponding datasets with  
433 our organoid proteins by gene name.



434

435 **References**

436

- 437 [1] J. Jo *et al.*, “Midbrain-like Organoids from Human Pluripotent Stem Cells Contain  
438 Functional Dopaminergic and Neuromelanin-Producing Neurons,” *Cell stem cell*, vol. 19,  
439 no. 2, pp. 248–257, Aug. 2016, doi: 10.1016/j.stem.2016.07.005.
- 440 [2] I. Kelava and M. A. Lancaster, “Stem Cell Models of Human Brain Development,” *Cell*  
441 *Stem Cell*, vol. 18, no. 6, pp. 736–748, Jun. 2016, doi: 10.1016/j.stem.2016.05.022.
- 442 [3] J. A. Bagley, D. Reumann, S. Bian, J. Lévi-Strauss, and J. A. Knoblich, “Fused cerebral  
443 organoids model interactions between brain regions,” *Nature Methods*, vol. 14, no. 7, pp.  
444 743–751, 2017, doi: 10.1038/nmeth.4304.
- 445 [4] A. Chen, Z. Guo, L. Fang, and S. Bian, “Application of Fused Organoid Models to Study  
446 Human Brain Development and Neural Disorders,” *Frontiers in Cellular Neuroscience*,  
447 vol. 14, p. 133, 2020, doi: 10.3389/fncel.2020.00133.
- 448 [5] N.-V. Mohamed *et al.*, “Midbrain organoids with an SNCA gene triplication model key  
449 features of synucleinopathy,” *Brain Communications*, Sep. 2021, doi:  
450 10.1093/braincomms/fcab223.
- 451 [6] A. Fatehullah, S. H. Tan, and N. Barker, “Organoids as an in vitro model of human  
452 development and disease,” *Nature Cell Biology*, vol. 18, no. 3, pp. 246–254, 2016, doi:  
453 10.1038/ncb3312.
- 454 [7] N.-V. Mohamed *et al.*, “Microfabricated disk technology: Rapid scale up in midbrain  
455 organoid generation,” *Methods*, Jul. 2021, doi: 10.1016/J.YMETH.2021.07.008.
- 456 [8] S. H. Choi *et al.*, “A three-dimensional human neural cell culture model of Alzheimer’s  
457 disease,” *Nature*, vol. 515, no. 7526, pp. 274–278, Nov. 2014, doi: 10.1038/nature13800.
- 458 [9] F. Fecto, Y. T. Esengul, and T. Siddique, “Protein recycling pathways in  
459 neurodegenerative diseases,” *Alzheimer’s Research & Therapy*, vol. 6, no. 2, p. 13, 2014,  
460 doi: 10.1186/alzrt243.
- 461 [10] M. Karbowski and A. Neutzner, “Neurodegeneration as a consequence of failed  
462 mitochondrial maintenance,” *Acta Neuropathologica*, vol. 123, no. 2, pp. 157–171, 2012,  
463 doi: 10.1007/s00401-011-0921-0.
- 464 [11] D. P. Narendra and R. J. Youle, “Targeting mitochondrial dysfunction: role for PINK1  
465 and Parkin in mitochondrial quality control,” *Antioxidants & redox signaling*, vol. 14, no.  
466 10, pp. 1929–1938, May 2011, doi: 10.1089/ars.2010.3799.
- 467 [12] F. J. A. Dennissen, N. Kholod, and F. W. van Leeuwen, “The ubiquitin proteasome  
468 system in neurodegenerative diseases: Culprit, accomplice or victim?,” *Progress in*  
469 *Neurobiology*, vol. 96, no. 2, pp. 190–207, 2012, doi:  
470 <https://doi.org/10.1016/j.pneurobio.2012.01.003>.
- 471 [13] J. H. Son, J. H. Shim, K.-H. Kim, J.-Y. Ha, and J. Y. Han, “Neuronal autophagy and  
472 neurodegenerative diseases,” *Experimental & Molecular Medicine*, vol. 44, no. 2, pp. 89–  
473 98, 2012, doi: 10.3858/emm.2012.44.2.031.
- 474 [14] V. Dakic *et al.*, “Short term changes in the proteome of human cerebral organoids induced  
475 by 5-MeO-DMT,” *Scientific reports*, vol. 7, no. 1, p. 12863, Oct. 2017, doi:  
476 10.1038/s41598-017-12779-5.

- 477 [15] M. Notaras *et al.*, “Neurodevelopmental signatures of narcotic and neuropsychiatric risk  
478 factors in 3D human-derived forebrain organoids,” *Molecular Psychiatry*, 2021, doi:  
479 10.1038/s41380-021-01189-9.
- 480 [16] S.-E. Ong and M. Mann, “Mass spectrometry–based proteomics turns quantitative,”  
481 *Nature Chemical Biology*, vol. 1, no. 5, pp. 252–262, 2005, doi: 10.1038/nchembio736.
- 482 [17] S.-E. Ong, I. Kratchmarova, and M. Mann, “Properties of <sup>13</sup>C-Substituted Arginine in  
483 Stable Isotope Labeling by Amino Acids in Cell Culture (SILAC),” *Journal of Proteome*  
484 *Research*, vol. 2, no. 2, pp. 173–181, Apr. 2003, doi: 10.1021/pr0255708.
- 485 [18] J. S. Andersen *et al.*, “Nucleolar proteome dynamics,” *Nature*, vol. 433, no. 7021, pp. 77–  
486 83, 2005, doi: 10.1038/nature03207.
- 487 [19] A. Westman-Brinkmalm *et al.*, “SILAC zebrafish for quantitative analysis of protein  
488 turnover and tissue regeneration,” *Journal of Proteomics*, vol. 75, no. 2, pp. 425–434,  
489 2011, doi: <https://doi.org/10.1016/j.jprot.2011.08.008>.
- 490 [20] M. Looso, T. Borchardt, M. Krüger, and T. Braun, “Advanced identification of proteins in  
491 uncharacterized proteomes by pulsed in vivo stable isotope labeling-based mass  
492 spectrometry,” *Molecular & cellular proteomics : MCP*, vol. 9, no. 6, pp. 1157–1166, Jun.  
493 2010, doi: 10.1074/mcp.M900426-MCP200.
- 494 [21] M. Krüger *et al.*, “SILAC Mouse for Quantitative Proteomics Uncovers Kindlin-3 as an  
495 Essential Factor for Red Blood Cell Function,” *Cell*, vol. 134, no. 2, pp. 353–364, Jul.  
496 2008, doi: 10.1016/j.cell.2008.05.033.
- 497 [22] E. F. Fornasiero *et al.*, “Precisely measured protein lifetimes in the mouse brain reveal  
498 differences across tissues and subcellular fractions,” *Nature Communications*, vol. 9, no.  
499 1, p. 4230, 2018, doi: 10.1038/s41467-018-06519-0.
- 500 [23] Y. Duan *et al.*, “The role of leucine and its metabolites in protein and energy metabolism,”  
501 *Amino Acids*, vol. 48, no. 1, pp. 41–51, 2016, doi: 10.1007/s00726-015-2067-1.
- 502 [24] E. S. Vincow *et al.*, “The PINK1-Parkin pathway promotes both mitophagy and selective  
503 respiratory chain turnover in vivo,” *Proceedings of the National Academy of Sciences of*  
504 *the United States of America*, vol. 110, no. 16, pp. 6400–6405, Apr. 2013, doi:  
505 10.1073/pnas.1221132110.
- 506 [25] A. Gonneaud *et al.*, “A SILAC-Based Method for Quantitative Proteomic Analysis of  
507 Intestinal Organoids,” *Scientific Reports*, vol. 6, no. 1, p. 38195, 2016, doi:  
508 10.1038/srep38195.
- 509 [26] N. v Mohamed *et al.*, “Generation of human midbrain organoids from induced pluripotent  
510 stem cells [version 2; peer review: 3 approved, 1 approved with reservations] ,” *MNI*  
511 *Open Research*, vol. 3, no. 1, 2021, doi: 10.12688/mniopenres.12816.2.
- 512 [27] A. Shevchenko, H. Tomas, J. Havli, J. v Olsen, and M. Mann, “In-gel digestion for mass  
513 spectrometric characterization of proteins and proteomes,” *Nature Protocols*, vol. 1, no. 6,  
514 pp. 2856–2860, 2006, doi: 10.1038/nprot.2006.468.
- 515 [28] J. Cox and M. Mann, “MaxQuant enables high peptide identification rates, individualized  
516 p.p.b.-range mass accuracies and proteome-wide protein quantification,” *Nature*  
517 *Biotechnology*, vol. 26, no. 12, pp. 1367–1372, 2008, doi: 10.1038/nbt.1511.
- 518 [29] B. MacLean *et al.*, “Skyline: an open source document editor for creating and analyzing  
519 targeted proteomics experiments,” *Bioinformatics (Oxford, England)*, vol. 26, no. 7, pp.  
520 966–968, Apr. 2010, doi: 10.1093/bioinformatics/btq054.

- 521 [30] E. J. Hsieh *et al.*, “Topograph, a software platform for precursor enrichment corrected  
522 global protein turnover measurements,” *Molecular & cellular proteomics : MCP*, vol. 11,  
523 no. 11, pp. 1468–1474, Nov. 2012, doi: 10.1074/mcp.O112.017699.
- 524 [31] S. E. Calvo, K. R. Clauser, and V. K. Mootha, “MitoCarta2.0: an updated inventory of  
525 mammalian mitochondrial proteins,” *Nucleic acids research*, vol. 44, no. D1, pp. D1251–  
526 D1257, Jan. 2016, doi: 10.1093/nar/gkv1003.
- 527 [32] J. X. Binder *et al.*, “COMPARTMENTS: unification and visualization of protein  
528 subcellular localization evidence,” *Database : the journal of biological databases and*  
529 *curation*, vol. 2014, pp. bau012–bau012, Feb. 2014, doi: 10.1093/database/bau012.
- 530 [33] M. Kanehisa and S. Goto, “KEGG: Kyoto Encyclopedia of Genes and Genomes,” *Nucleic*  
531 *Acids Research*, vol. 28, no. 1, pp. 27–30, Jan. 2000, doi: 10.1093/nar/28.1.27.
- 532 [34] D. Szklarczyk *et al.*, “STRING v11: protein-protein association networks with increased  
533 coverage, supporting functional discovery in genome-wide experimental datasets,”  
534 *Nucleic acids research*, vol. 47, no. D1, pp. D607–D613, Jan. 2019, doi:  
535 10.1093/nar/gky1131.
- 536 [35] B. H. Toyama *et al.*, “Identification of Long-Lived Proteins Reveals Exceptional Stability  
537 of Essential Cellular Structures,” *Cell*, vol. 154, no. 5, pp. 971–982, Aug. 2013, doi:  
538 10.1016/j.cell.2013.07.037.
- 539 [36] L. D. Cohen *et al.*, “Metabolic turnover of synaptic proteins: kinetics, interdependencies  
540 and implications for synaptic maintenance,” *PloS one*, vol. 8, no. 5, pp. e63191–e63191,  
541 May 2013, doi: 10.1371/journal.pone.0063191.
- 542 [37] S. Heo *et al.*, “Identification of long-lived synaptic proteins by proteomic analysis of  
543 synaptosome protein turnover,” *Proceedings of the National Academy of Sciences of the*  
544 *United States of America*, vol. 115, no. 16, pp. E3827–E3836, Apr. 2018, doi:  
545 10.1073/pnas.1720956115.
- 546 [38] X. Zhao *et al.*, “Review on the Vascularization of Organoids and Organoids-on-a-Chip,”  
547 *Frontiers in Bioengineering and Biotechnology*, vol. 9, p. 223, 2021, doi:  
548 10.3389/fbioe.2021.637048.
- 549 [39] V. Velasco, S. A. Shariati, and R. Esfandyarpour, “Microtechnology-based methods for  
550 organoid models,” *Microsystems & Nanoengineering*, vol. 6, no. 1, p. 76, 2020, doi:  
551 10.1038/s41378-020-00185-3.  
552  
553
